# Supplementary material
Source: PubMed Central journal article supplement (PMC3003412)
Supplement: supp_M110.153791_jbc.M110.153791-1.pdf [file supp_M110.153791_jbc.M110.153791-1.pdf]

## SUPPLEMENTAL DATA

**Table S1.** Characteristics of K5 polysaccharide derivatives and modified heparin

| Test molecule            | Characteristics                                                                                                                  | Source                              |
|--------------------------|----------------------------------------------------------------------------------------------------------------------------------|-------------------------------------|
| K5                       | (GlcNAc-GlcA) <sub>n</sub> (47)                                                                                                  | Glycores (Milano, Italy)            |
| NdAcNS K5                | <i>N</i> -deacetylated/ <i>N</i> -sulfated K5 (47)                                                                               | Glycores (Milano, Italy)            |
| epiNdAcNS K5             | epimerized <i>N</i> -deacetylated/ <i>N</i> -sulfated K5                                                                         | Glycores (Milano, Italy)            |
| OS K5 (low)              | low <i>O</i> -sulfated K5: 90% GlcNAc6OS, 10% GlcNAc (47)                                                                        | Glycores (Milano, Italy)            |
| NdAcNS/OS K5 (low)       | <i>N</i> -deacetylated/ <i>N</i> -sulfated/low <i>O</i> -sulfated K5: 90% GlcNS6OS, 10% GlcNS (47)                               | Glycores (Milano, Italy)            |
| NdAcNS/OS K5 (high)      | <i>N</i> -deacetylated/ <i>N</i> -sulfated/high <i>O</i> -sulfated K5: 100% GlcNS6OS; 70% GlcA2,3OS, 30% GlcA2OS or GlcA3OS (47) | Glycores (Milano, Italy)            |
| heparin                  | 11.3% NAc, 88.7% NS, 69% 2OS, 79% 6OS                                                                                            | G. Ronzoni Institute (Milan, Italy) |
| CdSNAc heparin           | completely desulfated/ <i>N</i> -acetylated heparin                                                                              | Seikagaku (Tokyo, Japan)            |
| CdSNS heparin            | completely desulfated/ <i>N</i> -sulfated heparin                                                                                | Seikagaku (Tokyo, Japan)            |
| NdSNAc heparin           | <i>N</i> -desulfated/ <i>N</i> -acetylated heparin: 100% NAc, 0% NS, 69% 2OS, 79% 6OS                                            | G. Ronzoni Institute (Milan, Italy) |
| 2OdS heparin             | 2- <i>O</i> -desulfated heparin: 13% NAc, 87% NS, 0% 2OS, 79% 6OS                                                                | G. Ronzoni Institute (Milan, Italy) |
| partially 6OdS heparin   | 6- <i>O</i> -desulfated heparin: 13% NAc, 87% NS, 67% 2OS, 23% 6OS                                                               | G. Ronzoni Institute (Milan, Italy) |
| OdS heparin              | <i>O</i> -desulfated heparin                                                                                                     | Neoparin (Alameda, CA)              |
| carboxyl-reduced heparin | uronic acid COOH-reduced heparin                                                                                                 | Neoparin (Alameda, CA)              |
| HS                       |                                                                                                                                  | Celsus (Cincinnati, OH)             |

K5 is the non-sulfated precursor polysaccharide of HS/heparin derived from *E. coli*; the modified heparin preparations and HS are from porcine intestinal mucosa.

HS, heparan sulfate; (Glc)NAc, *N*-acetyl(glucosamine); (Glc)NS, *N*-sulfated(glucosamine); GlcA, D-glucuronic acid; IdoA, L-iduronic acid; OS, *O*-sulfate.

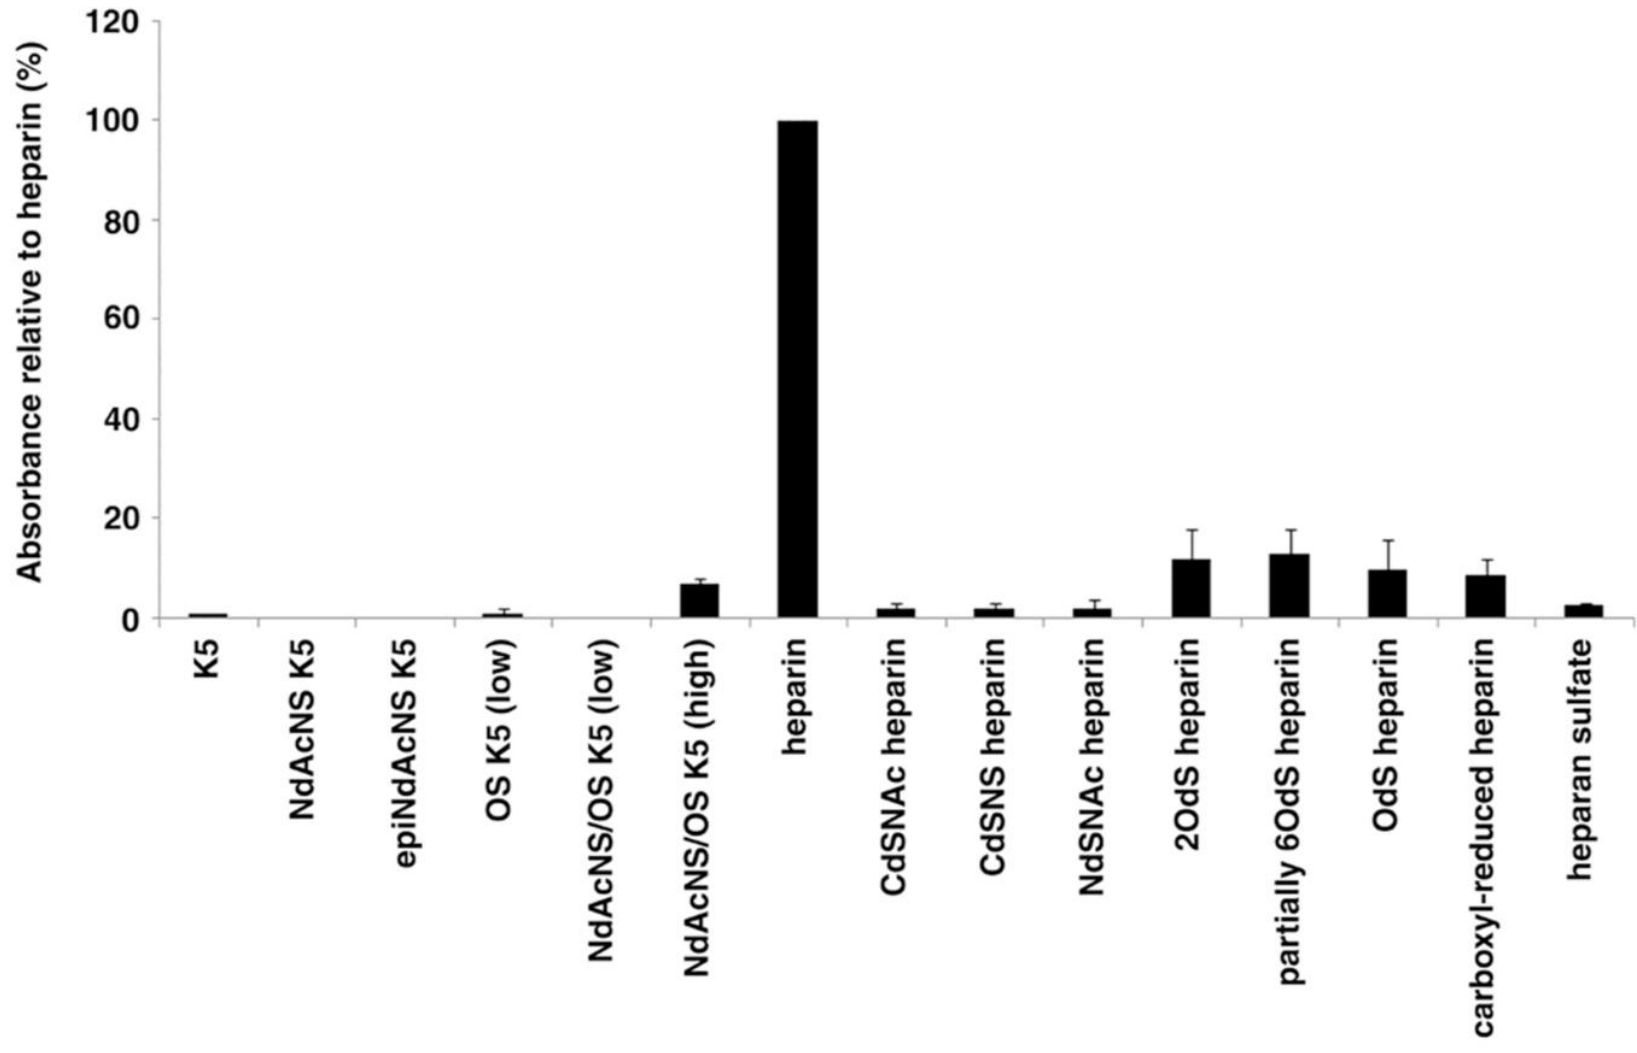

Fig. S1. Characterization of the NS4F5 epitope by ELISA. Antibody NS4F5 was applied to various immobilized GAG preparations. Bound antibodies were detected using mouse anti-VSV-tag IgG antibody P5D4, followed by alkaline phosphatase–conjugated rabbit anti-mouse IgG. Enzymatic activity was measured using *p*-nitrophenyl phosphate as a substrate. Bars represent the mean reactivity  $\pm$  SD ( $n = 4$ ) of the antibodies in percent relative to the reactivity with heparin.

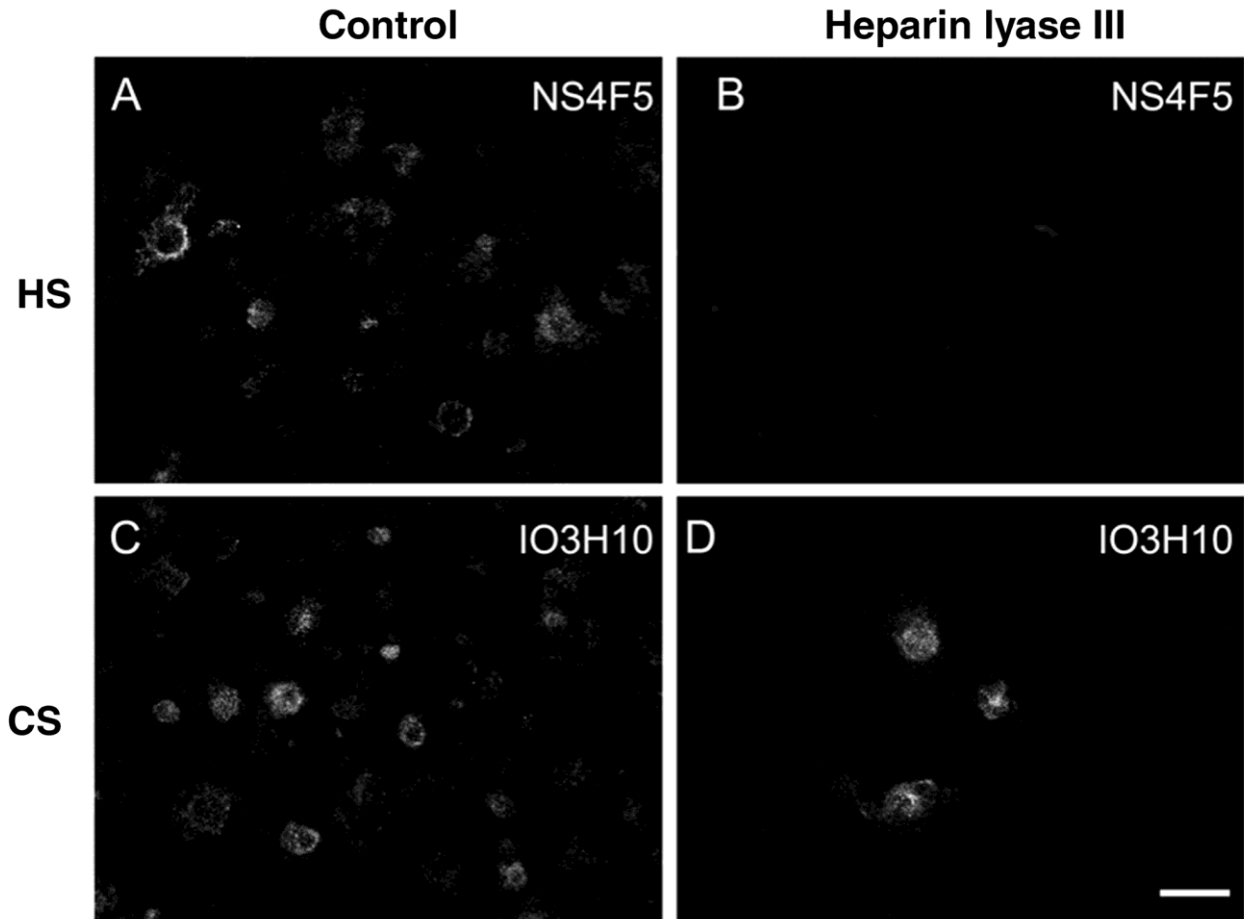

**Fig. S2.** Expression of the HS<sup>NS4F5</sup> motif by human lung epithelial cells. Human lung epithelial cells were stained with antibody NS4F5 (A) or anti-CS antibody IO3H10 (C). Bound antibodies were detected using mouse monoclonal antibody P5D4 followed by Alexa 488-conjugated goat anti-rabbit IgG. Human lung epithelial cells produce the HS<sup>NS4F5</sup> motif (A), which can be removed by heparin lyase III-treatment (B), indicating the epitope to be present in HS. Note that heparin lyase III-treatment had no effect on CS (C, D). *n* = 5, Bar, 50  $\mu$ m

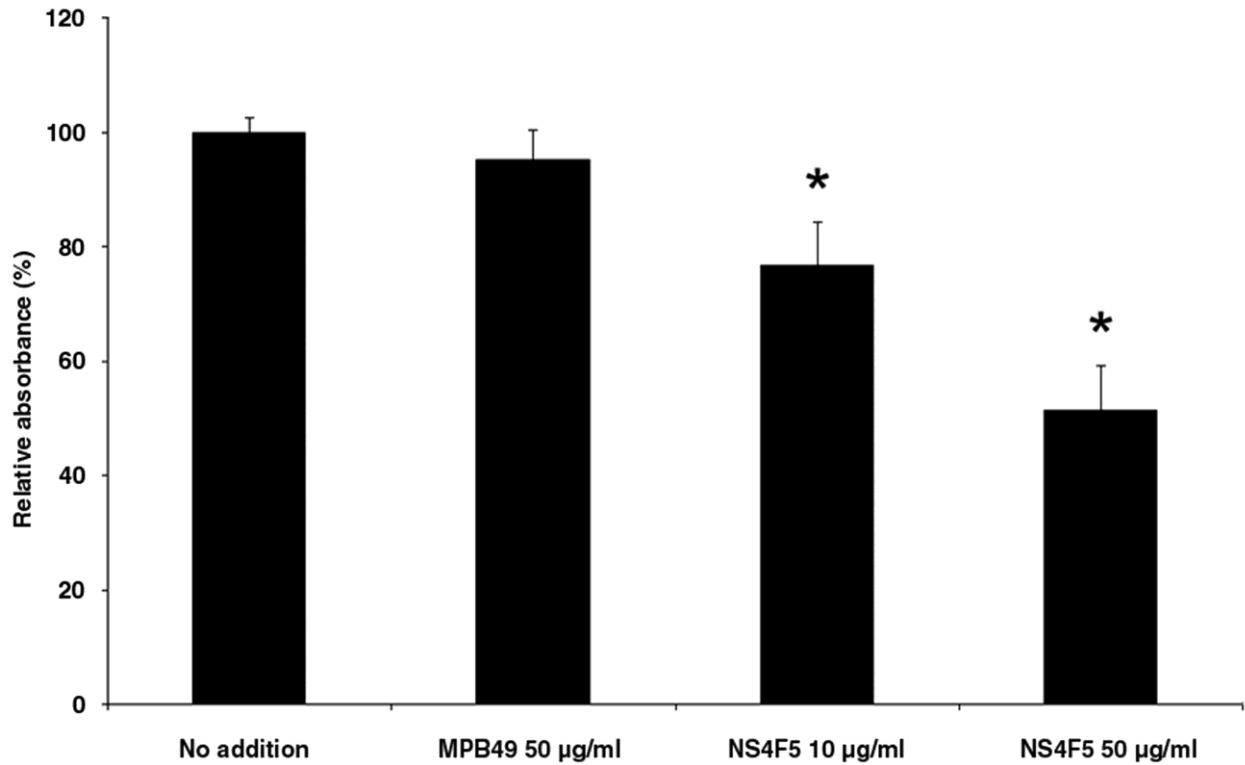

Fig. S3. HS<sup>NS4F5</sup> immunoblocking reduces cell proliferation. Human lung epithelial cells were incubated with or without the NS4F5 antibody (10 and 50 µg/ml) for 16 h. Proliferation was measured at 450 nm using the WST-1 assay (*see Methods*). Values are expressed as means  $\pm$  SD,  $n = 5$ ). Note that the effect of the NS4F5 antibody is dose dependent. As a control, cells were incubated with control antibody MPB49. \*,  $P < 0.05$
